# Supplementary material
Source: publisher figshare collection journal article supplement (https://sage.figshare.com/ndownloader/files/18090947)
Supplement: Supplementary file 1 [file 18090947]

**Supplementary Table 1. Vehicle composition**

| **Study ID** | **Treatment** | **Vehicle composition** |
| --- | --- | --- |
| Study 1 | Vehicle for Compound A | 8 mM phosphate, 184 mM propylene glycol, 58 mM phenol, pH 8.15 |
| Vehicle for Compound B | 50 mM sodium phosphate, 70 mM sodium chloride, 0.05% tween 80, pH 7.4 |
| Study 2 | Vehicle for Compound C | 10 mM phosphate, 2% glycerol, pH=7.6 |
| Vehicle for Compound D | 10 mM phosphate, 2% glycerol, pH=7.6 |
| Study 3 | Vehicle for Compound A | 8 mM phosphate, 184 mM propylene glycol, 58 mM phenol, pH 8.15 |
| Vehicle for Compound E | 8 mM phosphate, 184 mM propylene glycol, 58 mM phenol, pH 8.15 |
| Study 4 | Vehicle for compound A | 8 mM phosphate, 184 mM propylene glycol, 58 mM phenol, pH 8.15 |
| Vehicle for compound F | 8 mM phosphate, 184 mM propylene glycol, 58 mM phenol, pH 8.15 |
| Study 5 | Vehicle for Compound A | 8 mM phosphate, 184 mM propylene glycol, 58 mM phenol, pH 7.4 |
| Vehicle for Compound G | 50 mM phosphate, 70 mM sodium chloride, 0.05 % tween 80, pH 7.4 |
| Study 6 | Vehicle for Compound H | 8 mM phosphate, 184 mM propylene glycol, 58 mM phenol, pH 7.4 |
| Study 7 | Vehicle for Compound A | 8 mM phosphate, 184 mM propylene glycol, 58 mM phenol, pH 8.15 |
| Vehicle for compound I | 8 mM phosphate, 184 mM propylene glycol, 58 mM phenol, pH 7.4 |
| Study 8 | Vehicle for Compound J | 8 mM phosphate, 18 mg/ml propylene glycol, pH 7.4 |
